# Supplementary material for: Investigating the patient acceptable symptom state cut-offs: longitudinal data from a community cohort using the shoulder pain and disability index
Source: Springer Nature journal article supplement (doi:10.1007/s00296-019-04486-3), 2019-12-03

## Supplementary Material: Online Resource 2

**Article Title:** Investigating the Patient Acceptable Symptom State cut-offs: longitudinal data from a community cohort using the Shoulder Pain and Disability Index

**Journal:** Rheumatology International

**Authors:** Gui Tran<sup>1,2</sup>, Bright Dube<sup>1,2</sup>, Sarah R Kingsbury<sup>1,2</sup>, Alan Tennant<sup>1</sup>, Philip Conaghan<sup>1,2,3</sup>, Elizabeth M.A. Hensor<sup>1,2</sup>

**Affiliations:** <sup>1</sup>Leeds Institute of Rheumatic and Musculoskeletal Medicine, University of Leeds, Leeds, UK

<sup>2</sup>NIHR Leeds Biomedical Research Centre, Leeds Teaching Hospitals NHS Trust, Leeds, UK

<sup>3</sup>Centre for Sport, Exercise and Osteoarthritis Research, Versus Arthritis, Nottingham, UK

### **CORRESPONDING AUTHOR:**

Dr Elizabeth Hensor,

Leeds Institute of Rheumatic and Musculoskeletal Medicine,

2nd Floor Chapel Allerton Hospital, Chapeltown Rd,

Leeds, LS7 4SA, UK

Phone: +44 (0)113 3924883

Fax: +44 (0)113 3924991

Email: [E.M.A.Hensor@leeds.ac.uk](mailto:E.M.A.Hensor@leeds.ac.uk)

## Online Resource 2 Supplementary Results: Tables S1-S2 & Figure S1

Table S1. Reliability estimates for SPADI scores

| SPADI score | Standard error of measurement (SEM) | Smallest detectable change (SDC) | Smallest detectable difference (SDD) |
|-------------|-------------------------------------|----------------------------------|--------------------------------------|
| Total       | 3.5                                 | 12.9                             | 9.1                                  |
| Pain        | 5.3                                 | 14.4                             | 10.2                                 |
| Disability  | 5.2                                 | 12.2                             | 8.6                                  |

SPADI = shoulder pain and disability index

Table S2. Variability in PASS cut-offs at 6 months (n=304)

| Baseline score   |                          | 75 <sup>th</sup> percentile method |                      |                      |              |              | ROC method       |                      |                      |               |              |
|------------------|--------------------------|------------------------------------|----------------------|----------------------|--------------|--------------|------------------|----------------------|----------------------|---------------|--------------|
| SPADI total      | Range (native)           | Cut-off (native)                   | Sensitivity (95% CI) | Specificity (95% CI) | PPV (95% CI) | NPV (95% CI) | Cut-off (native) | Sensitivity (95% CI) | Specificity (95% CI) | PPV (95% CI)  | NPV (95% CI) |
| Tertile 1        | 0-47.9<br>(0-43.8)       | 39.4<br>(16.2)                     | 76 (64, 85)          | 82 (63, 94)          | 91 (81, 97)  | 58 (41, 73)  | 40.6<br>(18.5)   | 80 (69, 89)          | 79 (59, 92)          | 90 (80, 96)   | 61 (44, 77)  |
| Tertile 2        | 48-53.6<br>(44.6-65.4)   | 47.4<br>(41.5)                     | 78 (68, 87)          | 65 (44, 83)          | 87 (76, 94)  | 52 (34, 69)  | 42.5<br>(23.1)   | 57 (45, 69)          | 100 (87, 100)        | 100 (92, 100) | 45 (32, 59)  |
| Tertile 3        | 53.9-78.1<br>(66.2-96.2) | 49.2<br>(50.0)                     | 75 (60, 86)          | 90 (79, 96)          | 86 (72, 95)  | 81 (69, 90)  | 50.3<br>(54.6)   | 79 (65, 90)          | 88 (76, 95)          | 84 (71, 94)   | 83 (72, 92)  |
| SPADI pain       | Range                    | Cut-off                            | Sensitivity          | Specificity          | PPV          | NPV          | Cut-off          | Sensitivity          | Specificity          | PPV           | NPV          |
| Tertile 1        | 0-43.3<br>(0-56.0)       | 36.7<br>(34.0)                     | 76 (64, 85)          | 83 (63, 95)          | 93 (84, 98)  | 53 (36, 69)  | 33.5<br>(24.0)   | 72 (60, 82)          | 92 (73, 99)          | 96 (88, 100)  | 51 (36, 67)  |
| Tertile 2        | 43.5-49.2<br>(58.0-72.0) | 40.3<br>(46.0)                     | 75 (63, 85)          | 71 (51, 87)          | 86 (75, 94)  | 54 (37, 71)  | 36.7<br>(34.0)   | 63 (51, 75)          | 93 (77, 99)          | 96 (85, 100)  | 51 (37, 65)  |
| Tertile 3        | 50.4-78.0<br>(74.0-94.0) | 46.4<br>(66.0)                     | 77 (63, 87)          | 85 (73, 93)          | 81 (67, 91)  | 81 (69, 90)  | 43.5<br>(58.0)   | 73 (58, 84)          | 92 (81, 97)          | 88 (74, 96)   | 79 (68, 88)  |
| SPADI disability | Range                    | Cut-off                            | Sensitivity          | Specificity          | PPV          | NPV          | Cut-off          | Sensitivity          | Specificity          | PPV           | NPV          |
| Tertile 1        | 0-42.6<br>(0-35.0)       | 25.1<br>(7.5)                      | 75 (64, 84)          | 72 (51, 88)          | 89 (79, 96)  | 49 (32, 66)  | 33.0<br>(15.0)   | 87 (77, 94)          | 68 (47, 85)          | 89 (80, 95)   | 63 (42, 81)  |
| Tertile 2        | 43.0-51.0<br>(36.3-61.3) | 43.4<br>(37.5)                     | 78 (66, 87)          | 61 (42, 78)          | 81 (70, 90)  | 56 (38, 73)  | 44.2<br>(40.0)   | 85 (74, 93)          | 61 (42, 78)          | 83 (72, 91)   | 66 (46, 82)  |
| Tertile 3        | 51.5-78.5<br>(62.5-95.0) | 46.8<br>(48.8)                     | 76 (62, 87)          | 86 (73, 94)          | 83 (69, 92)  | 80 (67, 89)  | 47.2<br>(50.0)   | 82 (69, 91)          | 86 (73, 94)          | 84 (70, 93)   | 84 (72, 92)  |

CI= confidence interval; NPV = negative predictive value; PPV = positive predictive value; ROC=receiver operating characteristic; SPADI = shoulder pain and disability index  
Ranges and cut-offs have been presented on both the Rasch-transformed scale, and the native ordinal scale, to illustrate the difference.

Figure S1. The relationship between native-scaled SPADI and Rasch-transformed SPADI a) total b) pain c) disability scores

Figure S1 shows the comparisons from left to right (SPADI total, pain and disability scores) between the original SPADI score (X-axis) and the Rasch-transformed equivalent (y-axis).

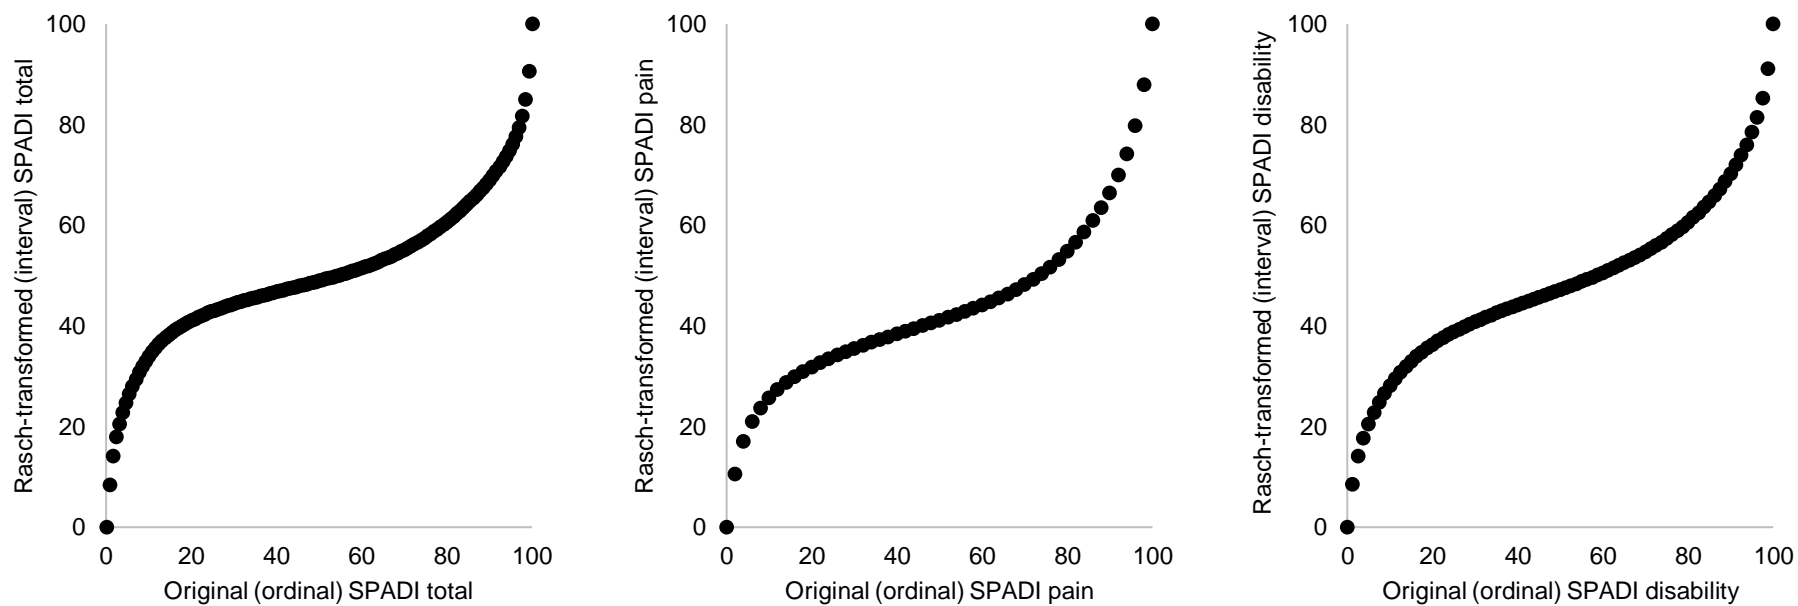

Supplement: MOESM2 [file 17463278]
